# Supplementary material for: A global view of gene expression in lithium and zinc treated sea urchin embryos: new components of gene regulatory networks
Source: PubMed Central journal article supplement (PMC1929154; doi:10.1186/gb-2007-8-5-r85), 2007-05-16
Supplement: gb-2007-8-5-r85-S1.pdf [file gb-2007-8-5-r85-S1.pdf]

**Fig. S1: WISH images of new endomesoderm genes in blastula stages**

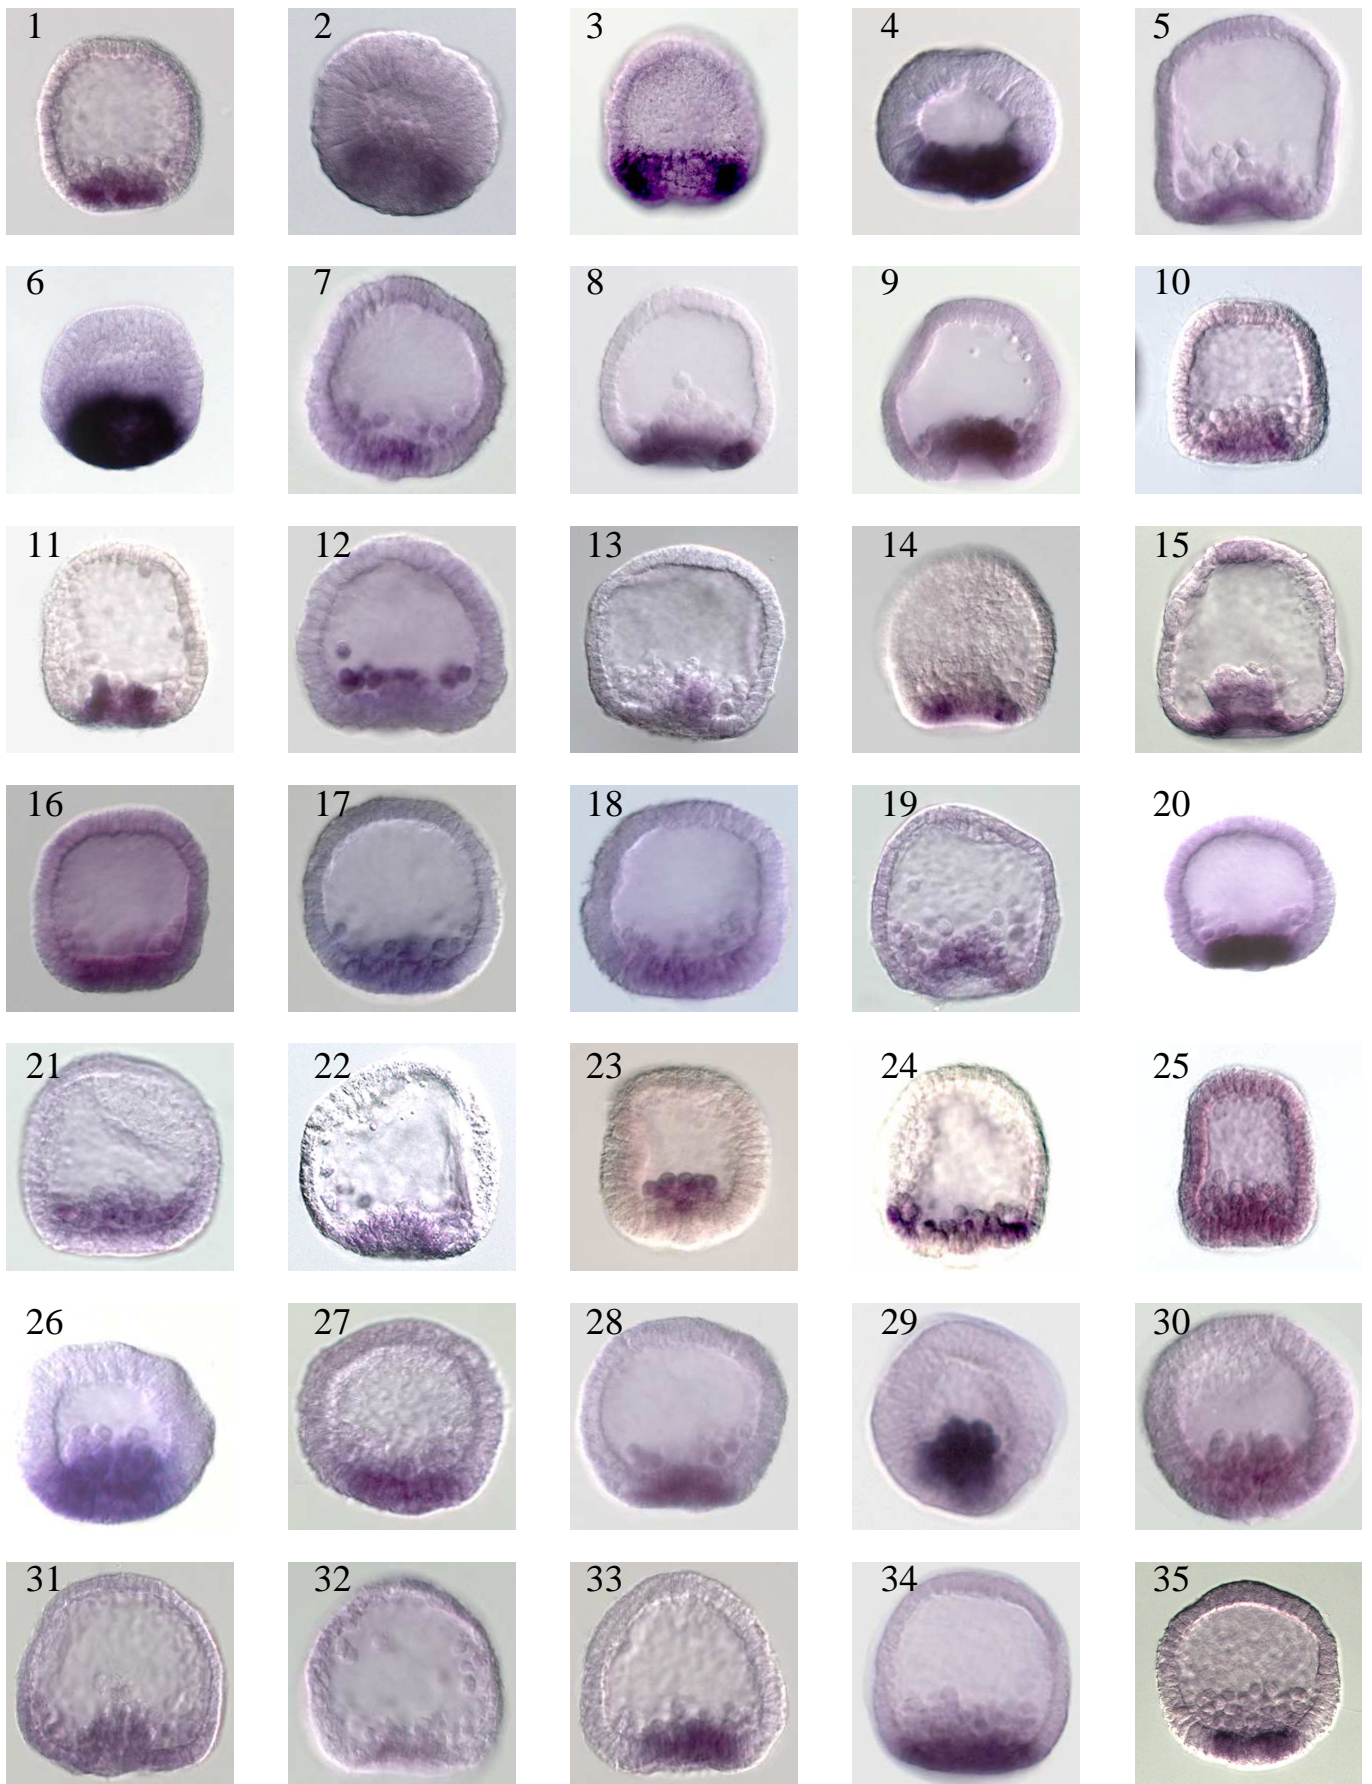

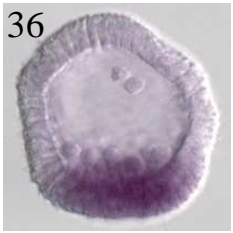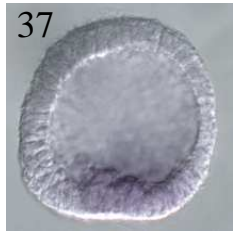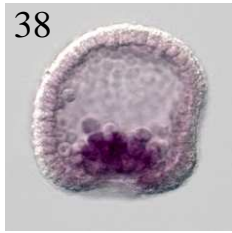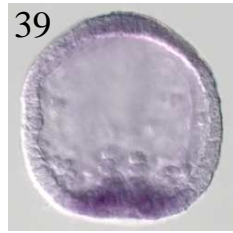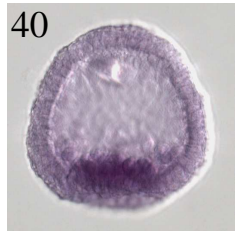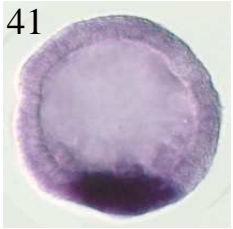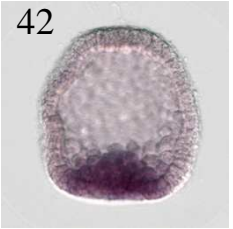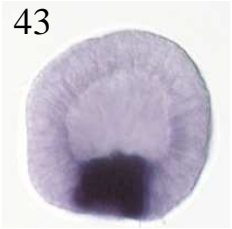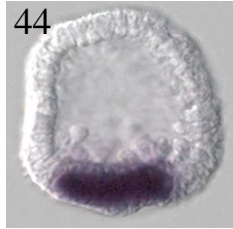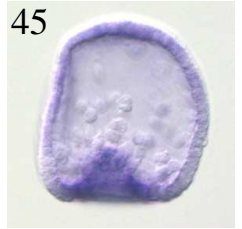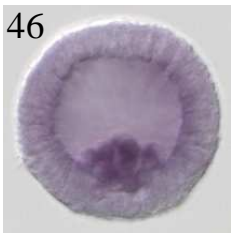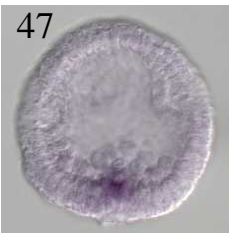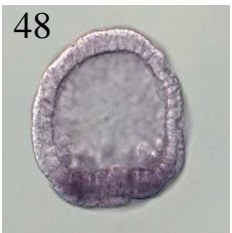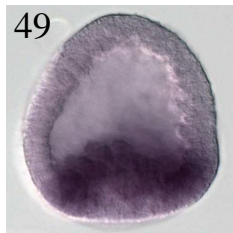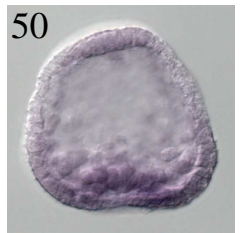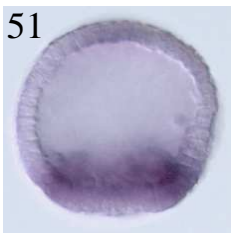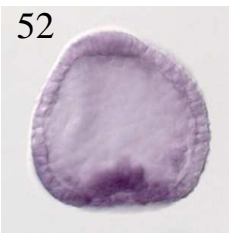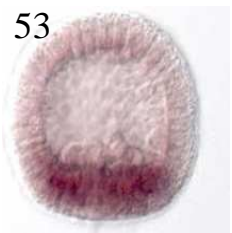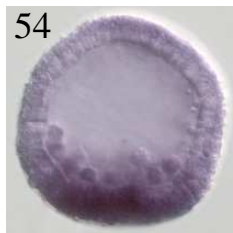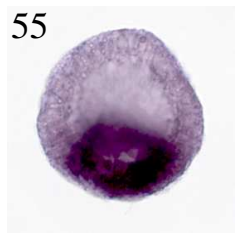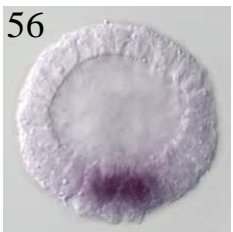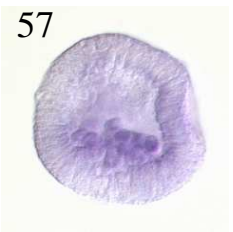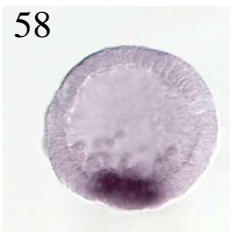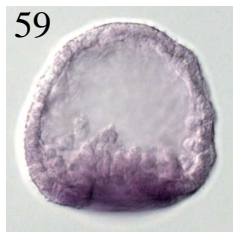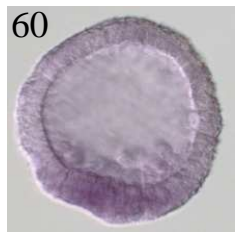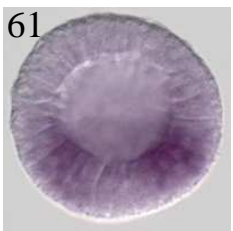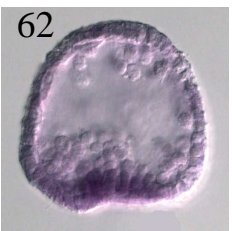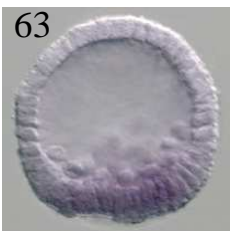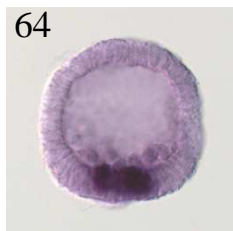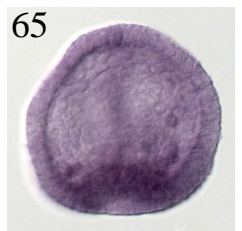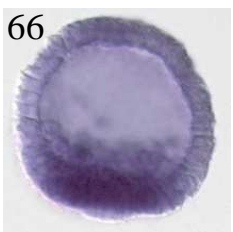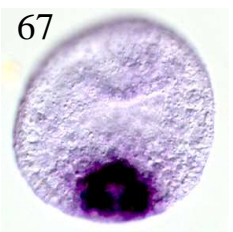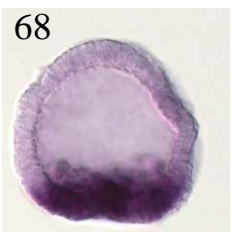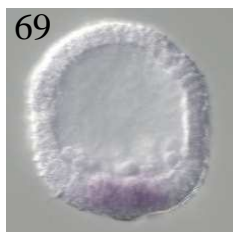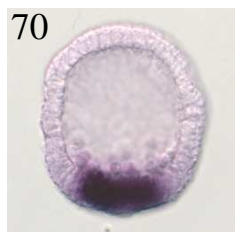



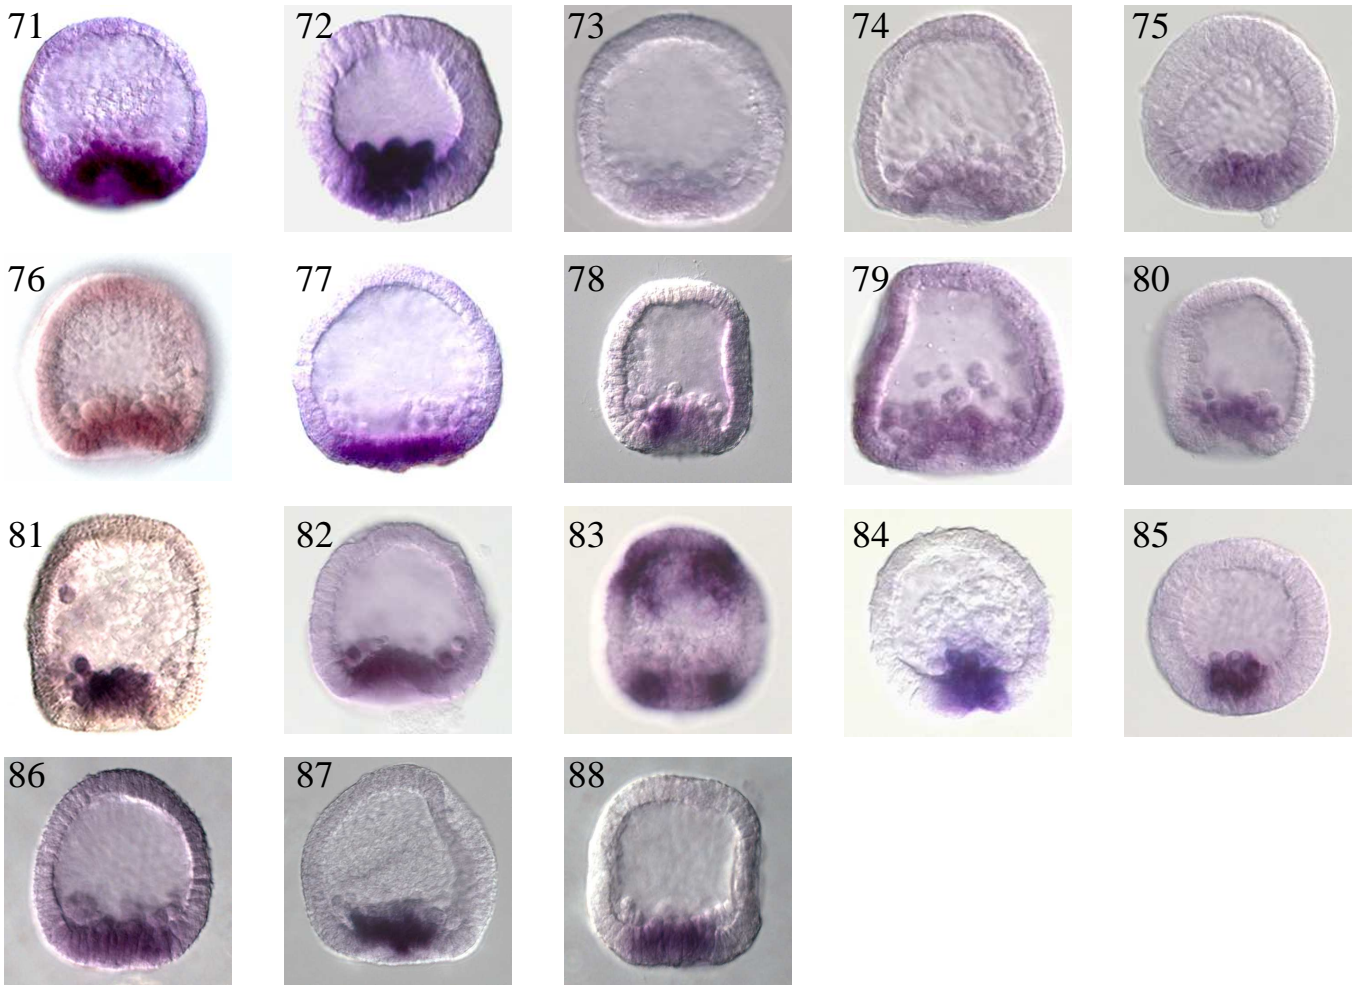

Clone names that can be used to query the WISH database and gene Ids are:

- 01 388\_536REAsu4\_4G6\_blas2a.jpg similar to homeobox nanog? Or Adhesive plaque matrix protein VLPV
- 02 125\_537REA\_12I5\_Blas\_1a.jpg avidin
- 03 611\_538REA\_4O4\_blas\_1b.jpg dachshund
- 04 538\_RUDIREA\_2H10\_14hr1d.jpg sox4
- 05 130\_538REA\_10H13\_EGas\_2a.jpg dead box rna helicase
- 06 541\_537REA\_2L11\_blas\_2a.jpg putative polyprotein
- 07 417\_RUDIREA\_5P3\_LBlas\_1a.jpg  
proline serine threonine phosphatase interacting protein 1
- 08 714\_RUDIREA\_33H6\_LBlas\_2b.jpg smad interacting protein
- 09 599\_RUDIREA\_36N15\_EGas\_2a.jpg Sp-HNRPR
- 10 339\_536REAsu4\_17M6\_blas\_1a.jpg hypothetical protein human flj30760
- 11 340\_536REAsu4\_13J21\_Egas\_3a.jpg unknown serine rich
- 12 257\_RUDIREA\_24K20\_LBlas\_2a.jpg microtubule associated protein
- 13 635\_538REA\_3N5\_LBlas\_2a.jpg protein-tyrosine phosphatase alpha precursor
- 14 357\_RUDIREA\_2B6\_blas\_1a.jpg paraneoplastic neuronal antigen ma3
- 15 230\_Rudirea\_20C4\_EGas\_1a.jpg Frzb1
- 16 706\_621REA\_1N13\_LBlas\_1a.jpg amnionless protein precursor
- 17 455\_RUDIREA\_33A16\_LBlas\_1a.jpg pol polyprotein
- 18 453\_RUDIREA\_21N17\_LBlas\_1a.jpg elongation factor 1 gamma
- 19 569\_RUDIREA\_41G14\_EGas\_1a.jpg Sp-Vdac2
- 20 575\_536REAsu4\_16C15\_Blas\_2a.jpg Sp-Nit1

21 557\_RUDIREA\_28A7\_LBlas\_2a.jpg talin  
22 016\_537REA\_15E20\_30hr\_1aX.jpg meta1  
23 368\_536REAsu4\_14E6\_Mblas\_2a-17.jpg Sp-Fmo3  
24 454\_RUDIREA\_26N21\_20h\_1aX.jpg Sp-Carbonic anhydrase-4-like-B  
25 159\_621REA\_7A10\_24hr\_3aX.jpg Ariadne RNA binding protein  
26 546\_537REA\_7F17\_Lblast\_8a.jpg Sp-Dao1  
27 508\_538REA\_9C21\_LBlas\_1a.jpg mili (miwi like)  
28 684\_537REA\_12B16\_Blas\_2a.jpg cofilin  
29 472\_536REAsu2\_6M17\_Blas\_1a.jpg Sp-cyclophilin  
30 667\_536REAsu4\_14A22\_LBlas\_2a.jpg B-cell translocation gene  
31 602\_RUDIREA\_31P4\_EGas\_1a.jpg signal sequence receptor beta subunit  
32 679\_RUDIREA\_2D4\_LBlas\_1a.jpg  
sparc precursor (secreted protein acidic and rich in cysteine)  
33 517\_RUDIREA\_20I10\_LBlas\_2a.jpg Sp-Acads  
34 474\_536REAsu2\_8F9\_LBlas\_1a.jpg Sp-Noval1  
35 237\_Rudirea\_19K21\_LBlas\_2a.jpg fimbrin  
36 101\_536REAsu2\_6H4\_LBlas\_1a.jpg Sp-AN-like4  
37 644\_RUDIREA\_14F18\_LBlas\_1a.jpg Transcription factor NTF-1 grainy head  
38 436\_RUDIREA\_18I10\_blas2a.jpg Sp-Cathepsin2  
39 696\_RUDIREA\_31D14\_LBlas\_3a.jpg 40s ribosomal protein s2  
40 240\_Rudirea\_21o23\_LBlas\_1a.jpg Sp-Six1/2  
41 632\_RUDIREA\_10M1\_Lblas\_1a.jpg Sp-Hadha , 78 kda gastrin-binding protein  
42 338\_536REAsu4\_14H13\_Lblas\_1a.jpg Sp-TRIO  
43 550\_537REA\_15K13\_Eblas\_1a.jpg Sp-P19  
44 703\_537REA\_9G14\_LBlas\_3a.jpg DMBT1  
45 529\_537REA\_6J13\_Egast\_1a.jpg Sp-seawi  
46 253\_RUDIREA\_21G8\_Blas\_1a.jpg microtubule associated protein PMC  
47 658\_RUDIREA\_2L21\_LBlas\_3a.jpg 70 kda heat shock protein  
48 603\_RUDIREA\_33E9\_Lblas\_2a.jpg Sp-Dmgdh  
49 146\_Rudirea\_33K5\_LBlas\_3a.jpg fibropellin-like  
50 419\_Rudirea\_9E15\_EGas\_1a.jpg Sp-Slc7a11 Cystine/glutamate transporter  
51 451\_RUDIREA\_1B4\_LBlas\_1a.jpg SpMLCK myosin light chain kinase  
52 694\_RUDIREA\_9I20\_EGas\_1a.jpg repeat?  
53 155\_536REAsu2\_4L15\_21hr\_1aX.jpg Sp-Hmgcr Coenzym A reductase  
54 675\_RUDIREA\_29E16\_Blas\_2a.jpg 90-kda heat shock protein hsp83  
55 649\_RUDIREA\_27A7\_Blas\_1b.jpg, Gypsy polyprotein  
56 681\_621REA\_1B17\_Blas\_2a.jpg presynaptic protein sap97  
57 537\_RUDIREA\_36F9\_Lblast\_1a.jpg  
Sp-WAP/IG growth and differentiation factor-associated serum protein 1  
ADHESION PROTEIN Sp-WAP/IG/KU/C345C  
58 585\_RUDIREA\_25B3\_blas\_1a.jpg peroxisomal bifunctional enzyme Sp-Ehhadh  
59 394\_Rudirea\_28G3\_EGas\_1a.jpg Sp-Slc7a11 Cystine/glutamate transporter  
60 512\_RUDIREA\_39H17\_LBlas\_1a.jpg  
eukaryotic translation initiation factor 3 p42 subunit Sp-EIF3S4  
61 92\_536REAsu4\_17J2\_Blas\_1a.jpg dlx  
62 725\_621Rea\_14C17\_LBlas\_2a.jpg SuH  
63 689\_538REA\_10O19\_LBlas\_2a.jpg  
Sp-eIF3S5-like eukaryotic translation initiation factor 3 subunit 5  
64 221\_RUDIREA\_13L18\_blas1a.jpg snail  
65 381\_537Rea\_13B9\_LBlas\_2a.jpg transcription elongation regulator 1  
66 118\_536REAsu4\_13G16\_LBlas\_1a.jpg Flavin containing monooxygenase 6  
67 662\_536REAsu4\_1F23\_Mgast\_3a.jpg penicillin binding protein ?  
68 175\_537REA\_13G10\_blas1a.jpg  
ubiquitin ligase protein mib2 putative nf-kappa-b-activating protein mind bomb2  
69 677\_537REA\_6D22\_Blas\_1a.jpg Sp-Aldoa fructose-bisphosphate aldolase 2  
70 219\_RUDIREA\_15N17\_Eblas3a.jpg Prox1

71 645\_RUDIREA\_17J13\_Egast\_2b.jpg pol-like peptide  
72 260\_RUDIREA\_24K14\_Egast\_3a.jpg c-fos  
73 688\_537REA\_16H4\_LBlas\_4a.jpg Sp-Cant1 apyrase  
  
74 617\_537REA\_16I22\_EGas\_1a.jpg  
eukaryotic translation initiation factor 3 subunit 6  
75 570\_RUDIREA\_34J12\_Blas\_3a.jpg  
Sp-carboxypeptidaseD-like carboxypeptidase d  
76 144\_RUDIREA\_28K19\_24hr\_1aX.jpg Chaperonin precursor  
77 651\_RUDIREA\_30O18\_Lblast\_4a.jpg  
retinitis pigmentosa 2 ?? GLEAN3\_26946 Scaffold90366  
78 403\_RUDIREA\_29D01\_LBlas\_2a-28.jpg Tbx6  
79 672\_RUDIREA\_39G20\_LBlas\_1a.jpg vacuolar sorting protein 35  
80 423\_RUDIREA\_12G12\_LBlas\_1b.jpg Sp-ELAV-like elav-like3  
81 062\_RUDIREA\_14B4\_30hr\_1a\_VX.jpg polycystin-like2  
82 600\_RUDIREA\_37F4\_Blas\_2a.jpg lysine hydroxylase  
83 245\_SpSMBLAS\_47F18\_Egas2b.jpg six3  
84 297\_SpSMBLAS\_127O24\_Lblast\_1a.jpg Sp-papss  
85 244\_SpSMBLAS\_124N22\_Eblas1a.jpg Hex  
86 461\_536Reasu4\_3B3\_LBlas\_1a.jpg Neuro-oncological ventral antigen 1  
87 720\_Rudirea\_21I02\_LBlas\_3a.jpg Sp-astacin protease 1  
88 460\_536Reasu4\_1D7\_LBlas\_3a.jpg alpha-mannosidase
