# Supplementary material for: A global view of gene expression in lithium and zinc treated sea urchin embryos: new components of gene regulatory networks
Source: PubMed Central journal article supplement (PMC1929154; doi:10.1186/gb-2007-8-5-r85), 2007-05-16
Supplement: gb-2007-8-5-r85-S2.pdf [file gb-2007-8-5-r85-S2.pdf]

**Table S1: Sequences of used Q-PCR primers**

| GENE                      | FORWARD SEQ              | REVERSE SEQ             | SIZE   | PRODUCT<br>T <sub>m</sub> |
|---------------------------|--------------------------|-------------------------|--------|---------------------------|
| β-Catenin                 | CAGAGCAATGCCACCTCACA     | CCCAGTCAAACATGCCCTG     | 109 bp | 85                        |
| ADP-Ribosylcyclase        | TGCCTACATACCCCATGACGT    | GCGCAGAAAAGGACAAGTTCA   | 101 bp | 81                        |
| AEX3                      | ACGTCGCTTACCCCACTACT     | GTGATGGCTGGAGAGAGAGCA   | 106 bp | 82                        |
| Alx                       | ACCCACCACTCCGTACCATG     | CTCGGGCTATCTCTTCCCG     | 104 bp | 80                        |
| Arginine kinase           | AGATTGGGAACCTCCGAGGT     | TCGATGGCTCTCCTTTCTC     | 101 bp | 79                        |
| Blimp1                    | GACGACGAAGCAAGTTGATC     | TTGAGACGTTTCGTCCATGG    | 102 bp | 80                        |
| BMP2/4                    | CAACTGCAGACGCCATGAAT     | CACCGCAGACAATAGTAGGCC   | 101 bp | 81                        |
| Brachury                  | TGGCAGTATCTCCCTCCTCG     | CCACATGCTGCCGTATTGACT   | 103 bp | 83                        |
| Chordin                   | CGGTGGTGATGTTGTCAAGGT    | AGTTTCGGATGCCACTCATCT   | 150 bp | 81                        |
| CoA-reductase             | CTCAGTGTGAGGTGGTGGACA    | GGTCCCAGTGTGATGACC      | 104 bp | 84                        |
| Delta*                    | ACGGAGCTACATGCCTGAAC     | TCACAATGGACCGAATCAGA    |        |                           |
| DLX                       | ACCCAGAGGCTCCAGTCA       | GCAGTTGTGGTTGCTGAGGTT   | 108 bp | 83                        |
| Endo16*                   | GACCGAACGCCGATATAAGA     | GCCATCGTCCCTTTAGTTCA    |        |                           |
| Evx                       | GGAGCATGCAGACATCGACAT    | TGGCCACCGCTCTTAACCT     | 101 bp | 80                        |
| FoxA*                     | CCAACCGACTCCGTATCATC     | CGTAGCTGCTCATGCTGTGT    |        |                           |
| FoxJ                      | CAAGCAGACCATGCCAAAGAA    | GGGACGCAGGCTTGTAGCT     | 107 bp | 82                        |
| FoxQ                      | AACGCTTCCGTTCTTCAAAG     | CTCCGCTACGTCCAGCCTT     | 102 bp | 80                        |
| GataE                     | TGGCTGGCTACTCGCCATAT     | CGTCCTGCAAAGTTTCCTCC    | 106 bp | 82                        |
| Glass                     | GGGTACGCATGTGTCTTCA      | TCAGGCTGCGAACCTCAA      | 119 bp | 80                        |
| Goosecoid*                | CCCCTACACTGGCTGCCCGATGA  | GCGGGCTAGTAGGTCCATGTGA  |        |                           |
| Hairy1                    | CCAGAACAGGGCGAGTCAA      | GATGCTCTCGCAATTGGACAT   | 102 bp | 80                        |
| Hatching enzyme           | CTGAGAATGGCGAATTTTTGC    | TGTGTCGGTCCGAATGTGG     | 101 bp | 78                        |
| Hex                       | ACTGCAAAGTGGGCGAGTTC     | CAGCACCATAAACACGAAGCA   | 104 bp | 82                        |
| HMX                       | TGCCTTTTATGCCTGGATGC     | TACTGTTGGTCAGTGGCTGGG   | 101 bp | 82                        |
| Hypothetical (crap value) | CAGCATGACTGCGCAAGGTA     | TCGTTTCTGTTGCCGATGAA    | 102 bp | 83                        |
| Iro                       | GCGGAGCAGGGATACGTACA     | CGGCGTAACCCTCTGGAGTA    | 103 bp | 84                        |
| KRL                       | TGGGAGCAAGGGTGACCTAT     | GTTTCGTGGCGATGTCGAG     | 102 bp | 82                        |
| Lefty                     | ACATCGACCCGATCGAGAGA     | AAGTCGGTTGCGAAGACCAT    | 70 bp  | 84                        |
| Lox                       | TTGCAATCCAACGACCAGC      | TGATGCCGTGCACCTAGATG    | 102 bp | 81                        |
| Mox                       | TGAAATGGAAACGCTGCAAA     | GCTAGAGCTTCCGGGTGGTA    | 101 bp | 81                        |
| Nkx2.2                    | GCGTTCGCACTGGTCTCTC      | TCAGGTTCCCGTTGAACACAT   | 144 bp | 80                        |
| Nodal+                    | GACATCACCAAGATCGTCAAACAG | ATTCTTGTGCTGGTTCAGCTTCT |        |                           |

|                       |                            |                             |        |    |
|-----------------------|----------------------------|-----------------------------|--------|----|
| Notch*                | ACGGAGCCAAGCCTAAGAA        | TCGTCACAGGCAACGAATAA        |        |    |
| Onecut*               | AACGGCTACGACCAATTCAC       | GATGAGGGTGTCCCGATAGA        |        |    |
| OTX                   | AGCCACGCCCTGCTAAGAA        | GCCGGGCTCCAAATACTGTT        | 148 bp | 82 |
| P19                   | CAACCCACCGAAGCTGAGAT       | TTCTGTAGAGCTGGAGCCG         | 101 bp | 82 |
| Pax2                  | GACGGGCTGGAAGAAACGT        | GCTGGACAACAAGGCACTGAA       | 104 bp | 82 |
| PMAR1*                | GCGTTCAACGACAACCAGTA       | GGTTGATGAGCAGAGCTTGA        |        |    |
| Prox                  | AAGGTTACAGGGATTCGGAGC      | TTGTGGTGGATACGTCAAGA        | 102 bp | 80 |
| Radical spoke protein | CAACAGGCTCTGGAGACCTTG      | CACACTACCAGCGACAGCTCA       | 125 bp | 80 |
| Six3                  | CCTACCGACCTCTGCTTCTC       | AGGACCACAAAATCGGGC          | 101 bp | 81 |
| SM50*                 | CCGATGGCCTCAACAGATCGAACCTA | GCTGTCCAGGCCAGTGTCCACCGTCAT |        |    |
| SMAD2                 | TCCCAAAGCTGCATCCCTT        | GGTGGCTTTGAAGATCAGGC        | 107 bp | 81 |
| SMiP1                 | CAAGGAATGCGGCAAAGCT        | TCTTGAGGCATCGGTCACT         | 101 bp | 82 |
| Snail                 | CCACAGCATAACGACGAGG        | CTCGGGTTTGTGGATAACTGG       | 101 bp | 82 |
| Sox4                  | CAAGTACCGTCCCCGAAAGAA      | TCGATGATGACTTGGGCTTGT       | 101 bp | 81 |
| SoxB1*                | ATTCTGTGAACGTGATGGCA       | TTGTCCTCTTGACCACCA          |        |    |
| SoxB2                 | AACATGGCATCGGCAGAGA        | TTTTTGAGCGTGTCCAGCAC        | 111 bp | 82 |
| SpAN                  | TGCTCGTTGGACCTCAAACA       | GGTATGTGCTCCCAGTGGT         | 103 bp | 80 |
| Spec2A*               | CCACCCTTGCCACTCCTTGAAAGCAA | GCCATCGCCATCCGTGTCTTCTGATT  |        |    |
| Sp-sFRP1/5            | TGCGCTTTCCTCGTTTCCT        | ACCGGTTAACGATGGCGTATA       | 101 bp | 82 |
| SuH*                  | GCTCCATCGTTGATGATCTCT      | GGACGCTGATGATCCAGTCT        | 156 bp |    |
| T-Brain               | AGGCACCTCTCCAAAGCTGTC      | GGCGCCTCTTGGTTGATATA        | 106 bp | 81 |
| Tbx2                  | GGGATCACCTTCGCAGACTTC      | CAGAGCACCACATGTACCACG       | 102 bp | 80 |
| Tbx4/5                | TCAGTCGGACGCAATGAGTG       | CCTAGTCCGCTACCGCTCAAT       | 105 bp | 83 |
| Tcf/Lef               | GCGAATGCTGGTTACCCAA        | CCTCCCCGAGTCGTAGAGGT        | 103 bp | 82 |
| Ubiquitin*            | CACAGGCAAGACCATCACAC       | GAGAGAGTGCACCATCCTC         |        |    |
| Unknown               | CGTCAACCTGATCGGTTAACG      | AAGCAGCATCATCAGCAGTCC       | 105 bp | 75 |
| WNT-A                 | CCGACATCATTCCAAGTGTA       | GACGTTGCTGACGGGACAGT        | 101 bp | 83 |
| WNT-1                 | ACCTTCAGAACGGTGGGTGA       | AGCTTGATTCGGTTTCGCG         | 106 bp | 83 |
| WNT-3                 | TGCAAAGGCATACCAACATA       | TCGATACCGTATAGGCGC          | 101 bp | 82 |
| WNT-4                 | AGTGGGAAGCGTTCGAAAGA       | TGAGTGACGACCTAGCGTCT        | 104 bp | 80 |
| WNT-5*                | TGCTGTGGAAGAGGCTACAA       | TTCTGCACTTCCGACTTG          |        |    |
| WNT-6                 | CAACAGCGGCGAGAATCTC        | GATCAGGCTCGCAGAAGTCG        | 104 bp | 81 |
| WNT-7                 | ACAGGATGTGCTGCTGATTC       | CATACATGCCTCGGTGATGG        | 103 bp | 84 |
| WNT-8*                | TGTCGTTCAATCAAGCCATC       | TATCACTCGCCATTCGTTCA        |        |    |

|        |                       |                       |        |    |
|--------|-----------------------|-----------------------|--------|----|
| WNT-9  | GTTCGAAGACGGGTTGACAAG | CCGATGCTATGGAAAGGACC  | 101 bp | 82 |
| WNT-10 | CAGTGCGGGTAAACTCCCAT  | CGCCGAACCTTGATGTCTGTG | 101 bp | 83 |
| WNT-16 | CGTGAAGTCATTGCATCGGAT | CGGTTACATTCTCGTCCCGT  | 110 bp | 80 |
| Z12-1* | AGTCGTCCAGCCATGTCTTT  | AAGCACACCTCGCACCTATC  |        |    |
| ZFhpf4 | ACCCACCCGTTGTCATGAAT  | CGCAGAACTCGCATATGAATG | 107 bp | 81 |

\* from <http://sugp.caltech.edu/resources/methods/q-pcr.php>

+ from **Flowers, V. L., Courteau, G. R., Poustka, A. J., Weng, W. and Venuti, J. M.** (2004).  
Nodal/activin signaling establishes oral-aboral polarity in the early sea urchin embryo.  
*Dev Dyn* **231**, 727-40.
